# Supplementary material
Source: PubMed Central journal article supplement (PMC3234870)
Supplement: supp_M111.310599_jbc.M111.310599-1.pdf [file supp_M111.310599_jbc.M111.310599-1.pdf]

# TLR2 and RIP2 Pathways Mediate Autophagy of *Listeria monocytogenes* via ERK activation

Paras K. Anand<sup>1</sup>, Stephen W.G. Tait<sup>1</sup>, Mohamed Lamkanfi<sup>2,3</sup>, Amal O. Amer<sup>4</sup>, Gabriel Nunez<sup>5</sup>, Douglas R. Green<sup>1</sup> and Thirumala-Devi Kanneganti<sup>1\*</sup>

**Figure S1**

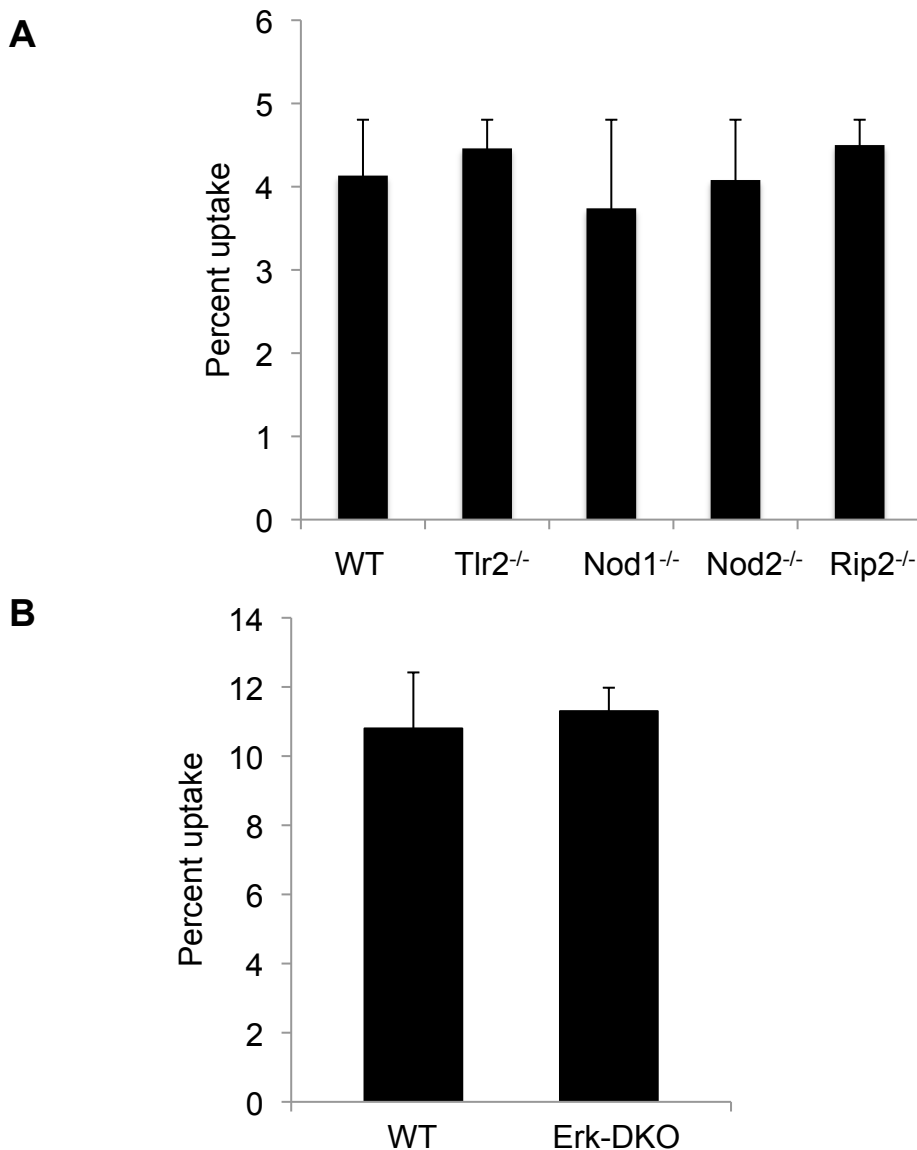

(A) BMDMs or (B) DCs were exposed to *L. monocytogenes* and the uptake of bacteria was determined by bacterial counts at 1h post-infection relative to input numbers.

## Figure S2

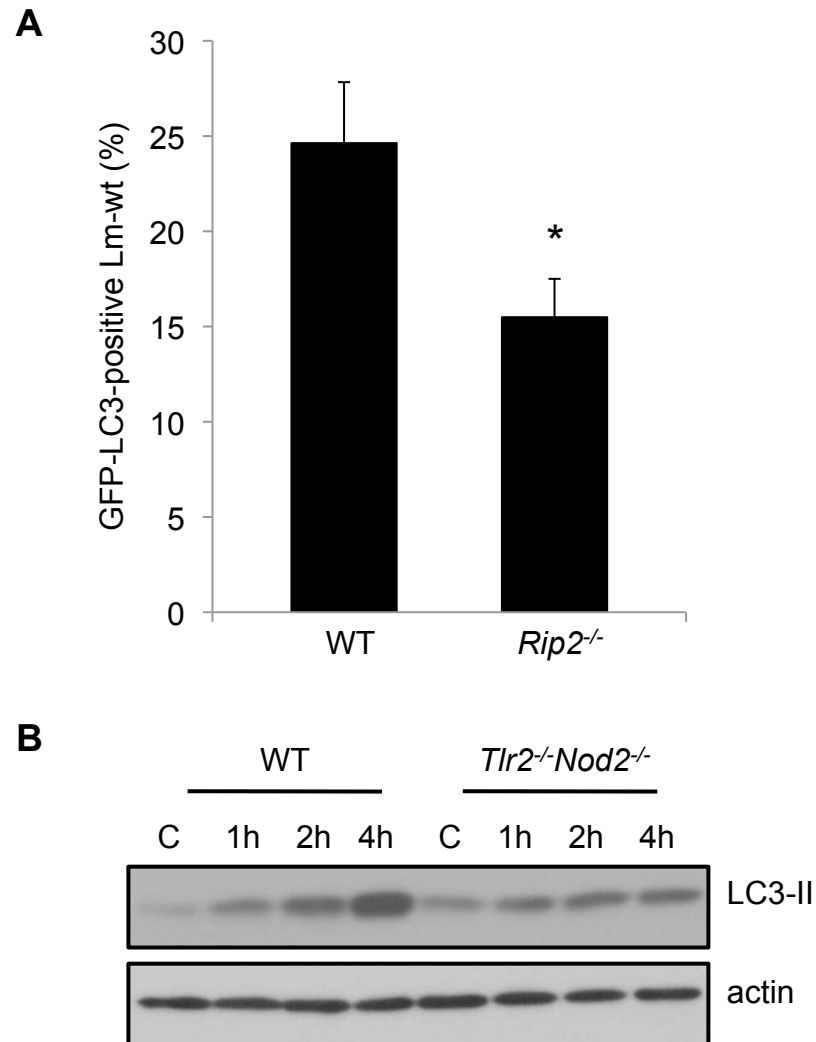

(A) Quantification of GFP-LC3 positive *L. monocytogenes* wild-type strain in WT and *Rip2*<sup>-/-</sup> at 4h post-infection.

(B) Western blots of LC3-II in wild-type (WT) and *Tlr2*<sup>-/-</sup>*Nod2*<sup>-/-</sup> macrophages that were uninfected (C) or infected with *L. monocytogenes* (*Lm*) for different periods. Actin was used as a loading control.

**Figure S3**

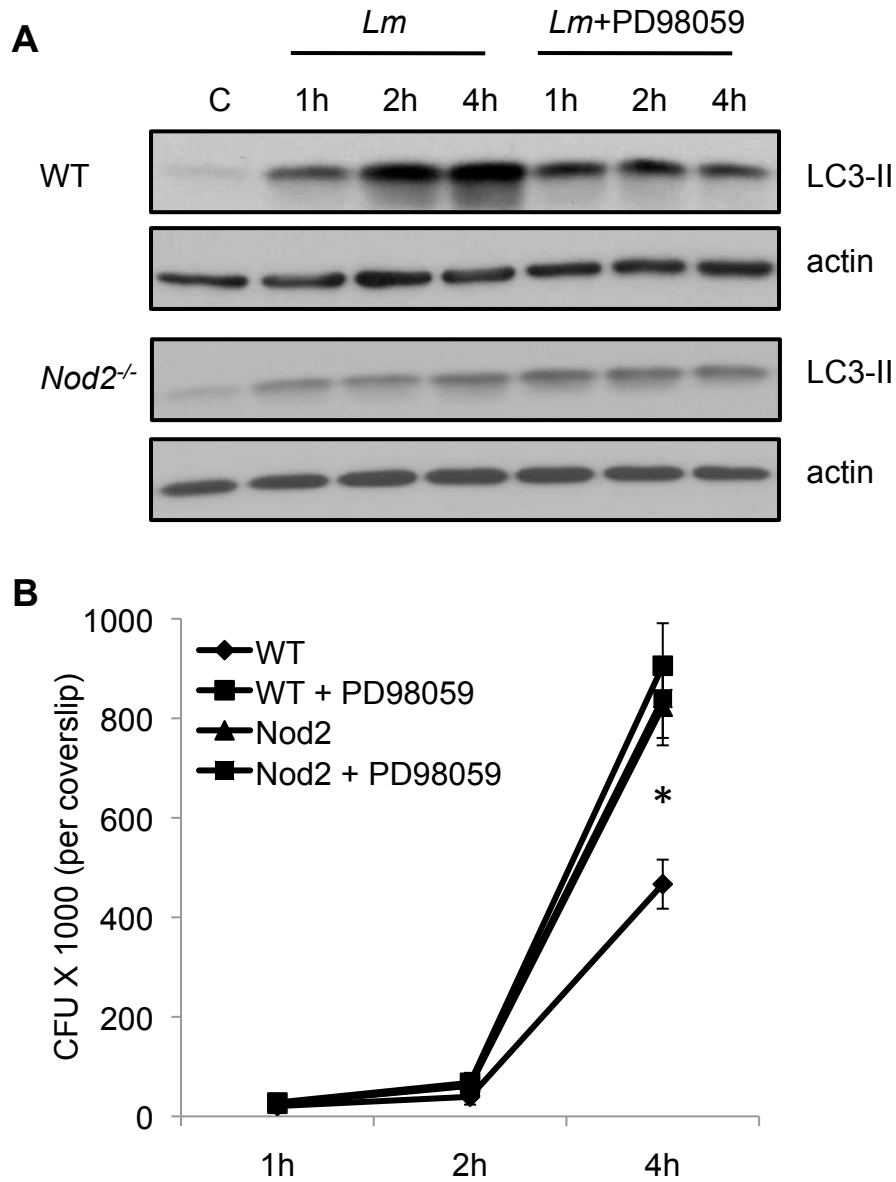

(A) Western blots of LC3-II in wild-type (WT) and *Nod2*<sup>-/-</sup> macrophages that were uninfected (C) or infected with *L. monocytogenes* (*Lm*) in the absence or presence of ERK-inhibitor PD98059 for different periods. Actin was used as a loading control.

(B) Intracellular growth curve of *L. monocytogenes* in Wild-type and *Nod2*<sup>-/-</sup> macrophages in the absence or presence of ERK-inhibitor PD98059 (\* $p \leq 0.05$ ).
